# Supplementary material for: Magnitude of Dural Tube Compression Still Does Not Show a Predictive Value for Symptomatic Lumbar Spinal Stenosis for Six-Year Follow-Up: A Longitudinal Observation Study in the Community
Source: MDPI journal article supplement (doi:10.3390/jcm11133668), 2022-06-25
Supplement: s1 [file s1]

Table S1. Time course of LSS symptoms

|                  |                         |              | Six-year follow-up       |                              |                    | Total |
|------------------|-------------------------|--------------|--------------------------|------------------------------|--------------------|-------|
|                  |                         |              | Typical LSS-<br>positive | LSS-negative                 |                    |       |
|                  |                         |              |                          | Insufficient<br>LSS symptoms | No<br>LSS symptoms |       |
| Initial analysis | Typical LSS<br>symptoms | Positive     | 13                       | 18                           | 21                 | 52    |
|                  |                         | Insufficient | 19                       | 21                           | 26                 | 66    |
|                  |                         | No           | 28                       | 40                           | 46                 | 114   |
| Total            |                         |              | 60                       | 79                           | 93                 | 232   |

Abbreviations:  
LSS: Lumbar Spinal Stenosis

Table S2. Relationship between change of typical LSS symptoms and the smallest DCSA

|                         |              |                    | The smallest DCSA (mm <sup>2</sup> ) |         |         |         |       |
|-------------------------|--------------|--------------------|--------------------------------------|---------|---------|---------|-------|
| Initial survey          |              | Six-year follow-up | <25                                  | 25-49.9 | 50-74.9 | 75-99.9 | 100 ≤ |
| Typical<br>LSS symptoms | Positive     | Positive           | 2                                    | 3       | 1       | 4       | 3     |
|                         |              | Insufficient       | 8                                    | 4       | 0       | 4       | 4     |
|                         |              | Negative           | 6                                    | 5       | 6       | 1       | 1     |
|                         | Insufficient | Positive           | 1                                    | 5       | 5       | 3       | 5     |
|                         |              | Insufficient       | 1                                    | 8       | 4       | 7       | 1     |
|                         |              | Negative           | 2                                    | 9       | 3       | 5       | 7     |
|                         | No           | Positive           | 2                                    | 3       | 9       | 5       | 9     |
|                         |              | Insufficient       | 1                                    | 5       | 11      | 8       | 15    |
|                         |              | Negative           | 3                                    | 12      | 10      | 11      | 10    |
| Total                   |              |                    | 26                                   | 54      | 49      | 48      | 55    |

Abbreviations:

DCSA: Dural sac Cross-Sectional Area

Av.: Average

CI: Confidence Interval

LSS: Lumbar Spinal Stenosis

Table S3. Relationship between change of LSS symptoms and the number of intervertebral discs whose DCSA was less than 50mm<sup>2</sup>

|                         |              |                    | The number of intervertebral discs whose DCSA was less than 50mm <sup>2</sup> |    |    |    |
|-------------------------|--------------|--------------------|-------------------------------------------------------------------------------|----|----|----|
| Initial survey          |              | Six-year follow-up | 0                                                                             | 1  | 2  | 3≤ |
| Typical<br>LSS symptoms | Positive     | Positive           | 8                                                                             | 2  | 3  | 0  |
|                         |              | Insufficient       | 8                                                                             | 6  | 3  | 1  |
|                         |              | Negative           | 8                                                                             | 5  | 4  | 4  |
|                         | Insufficient | Positive           | 13                                                                            | 5  | 1  | 0  |
|                         |              | Insufficient       | 12                                                                            | 5  | 3  | 1  |
|                         |              | Negative           | 14                                                                            | 9  | 3  | 0  |
|                         | No           | Positive           | 23                                                                            | 3  | 1  | 1  |
|                         |              | Insufficient       | 34                                                                            | 5  | 0  | 1  |
|                         |              | Negative           | 31                                                                            | 9  | 4  | 2  |
| Total                   |              |                    | 151                                                                           | 49 | 22 | 10 |

Abbreviations:

DCSA: Dural sac Cross-Sectional Area      LSS: Lumbar Spinal Stenosis
